# Supplementary material
Source: PubMed Central journal article supplement (PMC2666995)
Supplement: 0811841106_0811841106SI.pdf [file 0811841106_0811841106SI.pdf]

# Supporting Information

Bauersachs et al. 10.1073/pnas.0811841106

Table S1. Genes differentially expressed in endometria of day 18 SCNT and day 18 IVF pregnancies.

| BOE ID(s)                                                                                                    | Gene Symbol              | Gene Name                                                                         | Bta Entrez Gene ID | Hsa Entrez Gene ID | Fold-change SCNT/IVF | SAM Score | Q-value (%) |
|--------------------------------------------------------------------------------------------------------------|--------------------------|-----------------------------------------------------------------------------------|--------------------|--------------------|----------------------|-----------|-------------|
| BOE-07-E12                                                                                                   | <i>ACSL3</i>             | acyl-CoA synthetase long-chain family member 3                                    | 100138312          | 2181               | -1.3                 | -2.80     | 2.98        |
| BOE-13-B05                                                                                                   | <i>ARHGDI3</i>           | Rho GDP dissociation inhibitor (GDI) beta                                         | 327676             | 397                | -1.3                 | -2.22     | 5.24        |
| BOE-02-A03                                                                                                   | <i>BOE-02-A03</i>        | unknown                                                                           |                    |                    | -2.2                 | -2.52     | 2.98        |
| BOE-09-H09                                                                                                   | <i>BOE-09-H09</i>        | unknown                                                                           |                    |                    | -1.3                 | -2.35     | 3.52        |
| BOE-01-B08 // BOE-03-B04                                                                                     | <i>BST2</i>              | bone marrow stromal cell antigen 2                                                | 507402             | 684                | -1.7                 | -3.73     | 1.49        |
| BOE-06-F06                                                                                                   | <i>CA2</i>               | carbonic anhydrase II                                                             | 280740             | 760                | -2.3                 | -3.43     | 0.00        |
| BOE-02-D12                                                                                                   | <i>CAPN6</i>             | calpain 6                                                                         | 539360             | 827                | -1.3                 | -2.22     | 5.24        |
| BOE-11-B01                                                                                                   | <i>DMBT1</i>             | deleted in malignant brain tumors 1                                               | 338056             | 1755               | -2.0                 | -4.45     | 0.00        |
| BOE-01-D06                                                                                                   | <i>DTX3L</i>             | deltex 3-like (Drosophila)                                                        | 515051             | 151636             | -1.3                 | -2.46     | 3.52        |
| BOE-02-D01                                                                                                   | <i>FABP3</i>             | fatty acid binding protein 3, muscle and heart (mammary-derived growth inhibitor) | 281758             | 2170               | -2.9                 | -3.69     | 0.00        |
| BOE-04-F06                                                                                                   | <i>FN1</i>               | fibronectin 1                                                                     | 280794             | 2335               | -1.5                 | -2.56     | 2.98        |
| BOE-09-F02                                                                                                   | <i>FOLR1</i>             | folate receptor 1 (adult)                                                         | 516067             | 2348               | -1.5                 | -2.32     | 5.24        |
| BOE-13-G10                                                                                                   | <i>FXYD4</i>             | FXYD domain containing ion transport regulator 4                                  | 506918             | 53828              | -1.6                 | -2.55     | 2.98        |
| BOE-14-B09                                                                                                   | <i>GJA1</i>              | gap junction protein, alpha 1, 43kDa (connexin 43)                                | 281193             | 2697               | -1.8                 | -3.77     | 0.00        |
| BOE-01-G04 // BOE-13-A03                                                                                     | <i>IFIT1</i>             | interferon-induced protein with tetratricopeptide repeats 1                       | 508267             | 3434               | -1.4                 | -2.42     | 4.11        |
| BOE-08-G07                                                                                                   | <i>KCMF1</i>             | potassium channel modulatory factor 1                                             | 613522             | 56888              | -1.4                 | -2.52     | 2.98        |
| BOE-04-A03                                                                                                   | <i>MGC151529</i> (HLA-A) | similar to RT1-149 protein; major histocompatibility complex, class I, A (hsa)    | 512672             | 3105               | -1.3                 | -2.66     | 2.98        |
| BOE-01-H06 // BOE-02-B09 // BOE-02-H09 // BOE-02-H11 // BOE-03-B10 // BOE-03-C10 // BOE-03-D10 // BOE-12-E04 | <i>MX2</i>               | myxovirus (influenza virus) resistance 2 (mouse)                                  | 280873             | 4600               | -1.5                 | -2.62     | 3.40        |
| BOE-04-D12                                                                                                   | <i>NR2F2</i>             | nuclear receptor subfamily 2, group F, member 1                                   | 281945             | 7026               | -1.5                 | -2.30     | 5.24        |
| BOE-03-C06 // BOE-05-G09                                                                                     | <i>PENK</i>              | proenkephalin                                                                     | 281387             | 5179               | -1.7                 | -2.26     | 5.24        |
| BOE-04-A05                                                                                                   | <i>PFKP</i>              | phosphofructokinase, platelet                                                     | 507119             | 5214               | -1.6                 | -2.53     | 2.98        |
| BOE-01-E03 // BOE-03-E10 // BOE-12-H05                                                                       | <i>PLET</i>              | placenta expressed transcript protein                                             | 505518             | 349633             | -2.6                 | -2.81     | 3.16        |
| BOE-07-F01                                                                                                   | <i>PRDX2</i>             | peroxiredoxin 2                                                                   | 286793             | 7001               | -1.5                 | -4.38     | 0.00        |
| BOE-08-A04                                                                                                   | <i>RN7SK</i>             | RNA, 7SK, nuclear                                                                 |                    | 125050             | -1.4                 | -2.61     | 2.98        |
| BOE-13-F10                                                                                                   | <i>RORB</i>              | RAR-related orphan receptor B                                                     | 528382             | 6096               | -1.4                 | -2.76     | 2.98        |
| BOE-07-C07                                                                                                   | <i>S100A12</i>           | S100 calcium binding protein A12 (calgranulin C)                                  | 282467             | 6283               | -1.9                 | -2.59     | 2.98        |
| BOE-03-C11                                                                                                   | <i>SDC2</i>              | syndecan 2 (heparan sulfate proteoglycan 1, cell surface-associated, fibroglycan) | 615785             | 6383               | -1.3                 | -2.70     | 2.98        |

Table S1. Continued

| BOE ID(s)                                               | Gene Symbol           | Gene Name                                                                                | Bta Entrez Gene ID | Hsa Entrez Gene ID | Fold-change SCNT/IVF | SAM Score | Q-value (%) |
|---------------------------------------------------------|-----------------------|------------------------------------------------------------------------------------------|--------------------|--------------------|----------------------|-----------|-------------|
| BOE-06-C08                                              | <i>THBS1</i>          | thrombospondin 1                                                                         | 281530             | 7057               | -1.5                 | -2.31     | 5.24        |
| BOE-11-C06                                              | <i>TRA1</i> (HSP90B1) | tumor rejection antigen (gp96)<br>1 (heat shock protein 90kDa<br>beta (Grp94), member 1) | 282646             | 7184               | -1.2                 | -2.26     | 5.24        |
| BOE-12-E05                                              | <i>TSPAN7</i>         | tetraspanin 7                                                                            | 615596             | 7102               | -1.4                 | -2.75     | 2.98        |
| BOE-07-G06                                              | <i>USP54</i>          | ubiquitin specific protease 54                                                           | 784739             | 159195             | -1.3                 | -2.53     | 2.98        |
| BOE-02-B01 // BOE-03-D12 //<br>BOE-04-D02 // BOE-12-E01 | <i>UTMP</i>           | uterine milk protein precursor                                                           | 286871             |                    | -2.0                 | -2.60     | 3.12        |
| BOE-02-H05                                              | <i>ZBTB20</i>         | zinc finger and BTB domain<br>containing 20                                              | 508864             | 26137              | -1.2                 | -2.58     | 2.98        |
| BOE-13-F04                                              | <i>AGT</i>            | angiotensinogen (serpin<br>peptidase inhibitor, clade A,<br>member 8)                    | 527114             | 183                | 1.4                  | 2.89      | 2.70        |
| BOE-10-E07                                              | <i>ANKRD26</i>        | ankyrin repeat domain 26                                                                 | 533620             | 22852              | 1.3                  | 2.43      | 5.24        |
| BOE-13-E08                                              | <i>BAIAP2L2</i>       | BAI1-associated protein 2-like 2                                                         | 617924             | 80115              | 1.8                  | 3.66      | 0.00        |
| BOE-13-H11                                              | <i>C17orf28</i>       | chromosome 17 open reading<br>frame 28                                                   | 540436             | 283987             | 1.3                  | 2.99      | 0.00        |
| BOE-04-C07                                              | <i>S100G</i>          | S100 calcium binding protein G                                                           | 281658             | 795                | 1.6                  | 2.44      | 5.24        |
| BOE-13-D11                                              | <i>CYP27A1</i>        | cytochrome P450, family 27,<br>subfamily A, polypeptide 1                                | 511960             | 1593               | 1.5                  | 2.45      | 5.24        |
| BOE-13-E11                                              | <i>CYP39A1</i>        | cytochrome P450, family 39,<br>subfamily A, polypeptide 1                                | 511195             | 51302              | 1.5                  | 2.72      | 2.70        |
| BOE-13-H12                                              | <i>DNAJB4</i>         | Dnaj (Hsp40) homolog,<br>subfamily B, member 4                                           | 541274             | 11080              | 1.4                  | 3.03      | 0.00        |
| BOE-06-C01                                              | <i>EED</i>            | embryonic ectoderm<br>development                                                        | 404183             | 8726               | 1.4                  | 3.34      | 0.00        |
| BOE-13-B10                                              | <i>EPHX1</i>          | epoxide hydrolase 1, microsomal<br>(xenobiotic)                                          | 535293             | 2052               | 1.4                  | 2.65      | 3.52        |
| BOE-01-G09                                              | <i>IDH1</i>           | isocitrate dehydrogenase 1<br>(NADP+), soluble                                           | 281235             | 3417               | 1.6                  | 3.61      | 0.00        |
| BOE-05-A08                                              | <i>LY6E</i>           | lymphocyte antigen 6 complex,<br>locus E                                                 | 510977             | 4061               | 1.4                  | 2.79      | 2.70        |
| BOE-05-E04                                              | <i>LY6G6E</i>         | lymphocyte antigen 6 complex,<br>locus G6E                                               | 512743             | 79136              | 2.3                  | 3.96      | 0.00        |
| BOE-11-F05                                              | <i>MRPL32</i>         | mitochondrial ribosomal protein<br>L32                                                   | 532842             | 64983              | 1.4                  | 2.80      | 2.70        |
| BOE-08-G08                                              | <i>NNAT</i>           | neuronatin                                                                               | 353114             | 4826               | 1.4                  | 2.94      | 2.70        |
| BOE-07-D05                                              | <i>NP</i>             | nucleoside phosphorylase                                                                 | 493724             | 4860               | 1.3                  | 2.65      | 3.52        |
| BOE-05-G11                                              | <i>PCSK5</i>          | proprotein convertase<br>subtilisin/kexin type 5                                         | 528098             | 5125               | 1.4                  | 3.34      | 0.00        |
| BOE-09-G04                                              | <i>PDLIM1</i>         | PDZ and LIM domain 1 (elfin)                                                             | 614675             | 9124               | 1.4                  | 2.49      | 5.24        |
| BOE-05-E07 // BOE-07-H02 //<br>BOE-11-E10               | <i>PEBP4</i>          | phosphatidylethanolamine-<br>binding protein 4                                           | 513254             | 157310             | 1.3                  | 2.52      | 4.66        |
| BOE-14-C06                                              | <i>RABEP1</i>         | rabaptin, RAB GTPase binding<br>effector protein 1                                       | 504785             | 9135               | 1.4                  | 2.62      | 3.52        |
| BOE-01-G01                                              | <i>REEP6</i>          | receptor accessory protein 6                                                             | 617543             | 92840              | 1.4                  | 2.88      | 2.70        |
| BOE-13-E07                                              | <i>REPS1</i>          | RALBP1 associated Eps domain<br>containing 1                                             | 536155             | 85021              | 1.2                  | 2.68      | 2.70        |
| BOE-01-H03 // BOE-05-B05 //<br>BOE-06-G11               | <i>SLC16A11</i>       | solute carrier family 16<br>(monocarboxylic acid<br>transporters), member 11             | 618274             | 162515             | 1.4                  | 3.27      | 0.90        |
| BOE-05-C06 // BOE-13-C08                                | <i>SOX17</i>          | SRY (sex determining region<br>Y)-box 17                                                 | 534010             | 64321              | 1.5                  | 3.41      | 0.00        |
| BOE-06-A03                                              | <i>SOX4</i>           | SRY (sex determining region<br>Y)-box 4                                                  | 768313             | 6659               | 1.3                  | 2.42      | 5.24        |

**Table S2. Genes differentially expressed in endometria of single ( $n = 4$ ) and twin ( $n = 5$ ) SCNT pregnancies based on the array results.**

| BOE ID(s)                | Gene symbol    | Gene name                                        | Bta Entrez Gene ID | Hsa Entrez Gene ID | Fold change Twin/Single | SAM Score | Q-value (%) |
|--------------------------|----------------|--------------------------------------------------|--------------------|--------------------|-------------------------|-----------|-------------|
| BOE-03-E10 // BOE-12-H05 | <i>PLET</i>    | placenta expressed transcript protein            | 505518             | 349633             | 5.2                     | 3.47      | 0.00        |
| BOE-02-D01               | <i>FABP3</i>   | fatty acid binding protein ( heart ) like        | 281758             | 2170               | 3.0                     | 3.05      | 0.00        |
| BOE-07-C07               | <i>S100A12</i> | S100 calcium binding protein A12 (calgranulin C) | 282467             | 6283               | 2.3                     | 3.01      | 0.00        |

**Table S3. Primers for quantitative real-time RT-PCR analysis.**

| Gene Symbol    | Forward Primer         | Reverse Primer        | Annealing Temperature [°C] | Fluorescence Acquisition [°C] | PCR Product Length [bp] |
|----------------|------------------------|-----------------------|----------------------------|-------------------------------|-------------------------|
| <i>PLET</i>    | TGCTGCATCCTTCTGTGTTT   | TCAGGTCTCCATTGGATCTG  | 60                         | 80                            | 126                     |
| <i>UTMP</i>    | ATATCATCTTCTCCCCATGG   | GTGCACATCCAACAGTTTGG  | 60                         | 80                            | 126                     |
| <i>GJA1</i>    | GTTGCCCAAAGTATGGTG     | TAGGTTCTCAGCAAGCCCC   | 60                         | 81                            | 122                     |
| <i>PENK</i>    | TCTGGAATGTGAGGGGAAAC   | CTTCTTAGCAAGCAGGTGGC  | 60                         | 78                            | 142                     |
| <i>MX2</i>     | CCCTCCTACAAGTGCACAGG   | CACAAAAGGGACGTTGGTG   | 60                         | 82                            | 121                     |
| <i>NR2F2</i>   | TGCTAAAAGAAGAGAGGGGAAG | TGTTCTGACCGACACAGGAG  | 60                         | 72                            | 123                     |
| <i>LY6E</i>    | CCTAGTGCCAGAGGAAC      | GACCCACAGCTCCTTCAAAC  | 60                         | 81                            | 147                     |
| <i>CYP39A1</i> | GGAGATAGAGGCCAGCTG     | GTCGTGTCTACTCCAGCCAAG | 60                         | 82                            | 147                     |
| <i>CYP27A1</i> | TAAGGGGCTGGATTCCTTG    | CAGTAACAAAGGTCATTGCGG | 60                         | 75                            | 138                     |
